# Supplementary material for: ROS production induced by BRAF inhibitor treatment rewires metabolic processes affecting cell growth of melanoma cells
Source: Springer Nature journal article supplement (doi:10.1186/s12943-017-0667-y), 2017-06-08

Figure S2

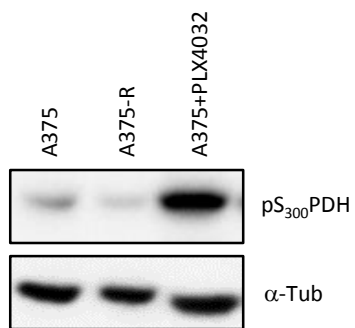

Supplement: MOESM2 [file 12351460]
